# Supplementary material for: BdorOBP2 plays an indispensable role in the perception of methyl eugenol by mature males of Bactrocera dorsalis (Hendel)
Source: PubMed Central journal article supplement (PMC5698463; doi:10.1038/s41598-017-15893-6), 2017-11-21
Supplement: 41598_2017_15893_MOESM1_ESM.pdf [file 41598_2017_15893_MOESM1_ESM.pdf]

*BdorOBP2* plays an indispensable role in the perception of methyl eugenol by mature males of *Bactrocera dorsalis* (Hendel)

Huan Liu<sup>1</sup>, Xiao-Feng Zhao<sup>1</sup>, Lang Fu<sup>2</sup>, Yi-Ye Han<sup>1</sup>, Jin Chen<sup>1</sup>,  
Yong-Yue Lu<sup>1\*</sup>

### Odorant binding protein 2

(Protein Accession Number: S5R7H8; Peptides Sequence: gTDEcDTAFQIR)

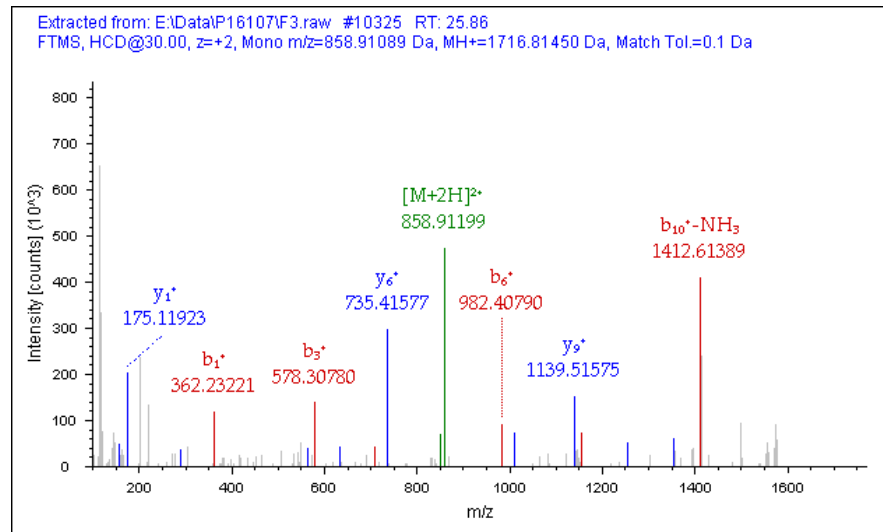

### Odorant binding protein 69a

(Protein Accession Number: A0A0G2UEV0; Peptides Sequence: aTGELPNNQNLk)

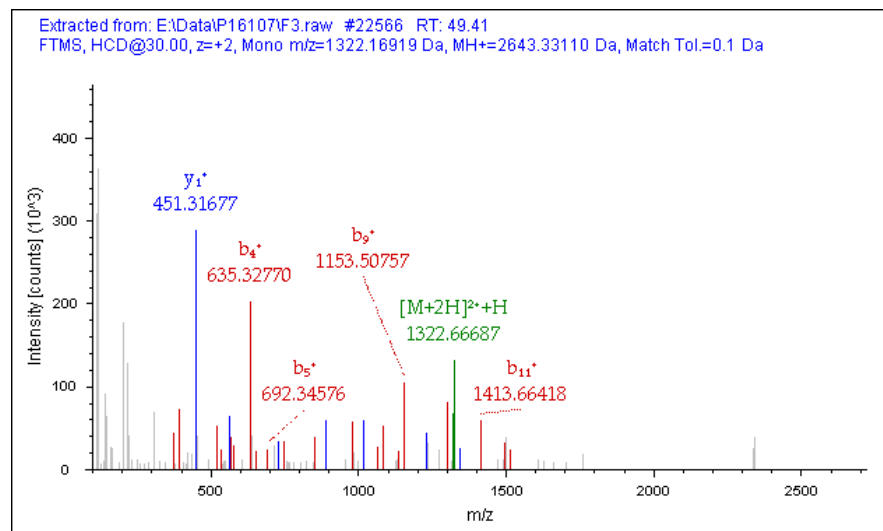

### Odorant receptor 94b

(Protein Accession Number: A0A0G2UEY4; Peptides Sequence: tASANIII AVLk)

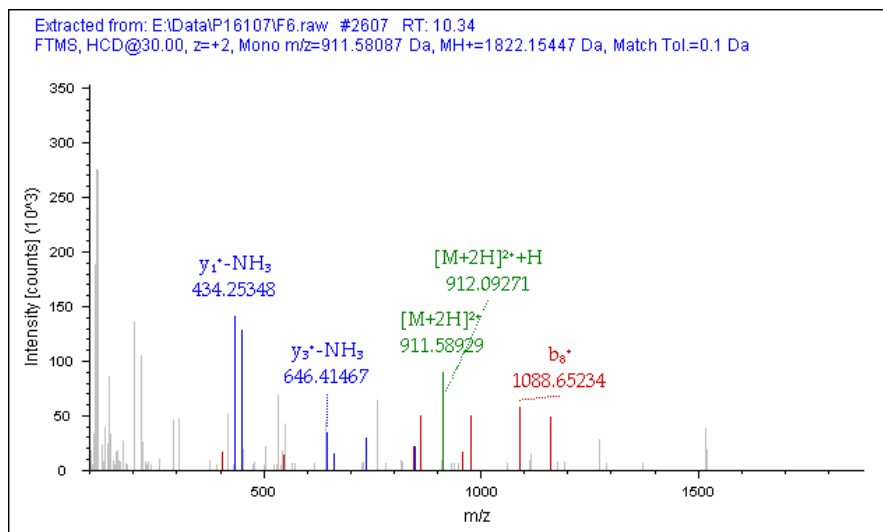

### Odorant binding protein 44a

(Protein Accession Number: A0A0G3Z7T5; Peptides Sequence: tQNLIAQLGQNk)

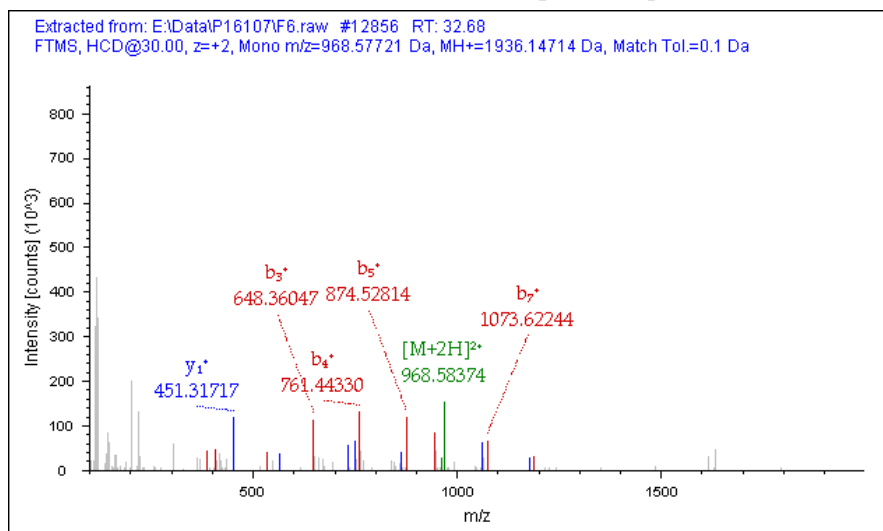

Putative odorant-binding protein A5

(Protein Accession Number: A0A034WGF4; Peptides Sequence: KYDMELVAGNIFTSR)

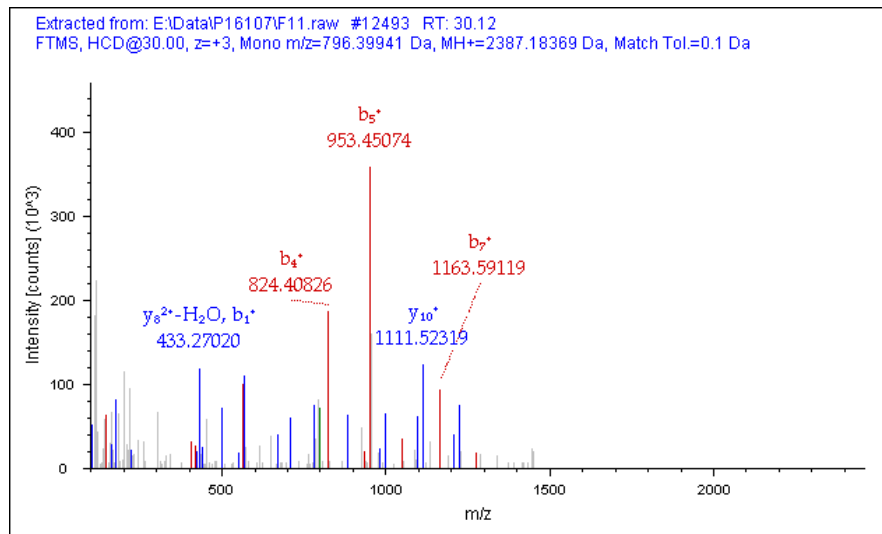

**Figure S1. Representative MS spectrum of eight peptides**

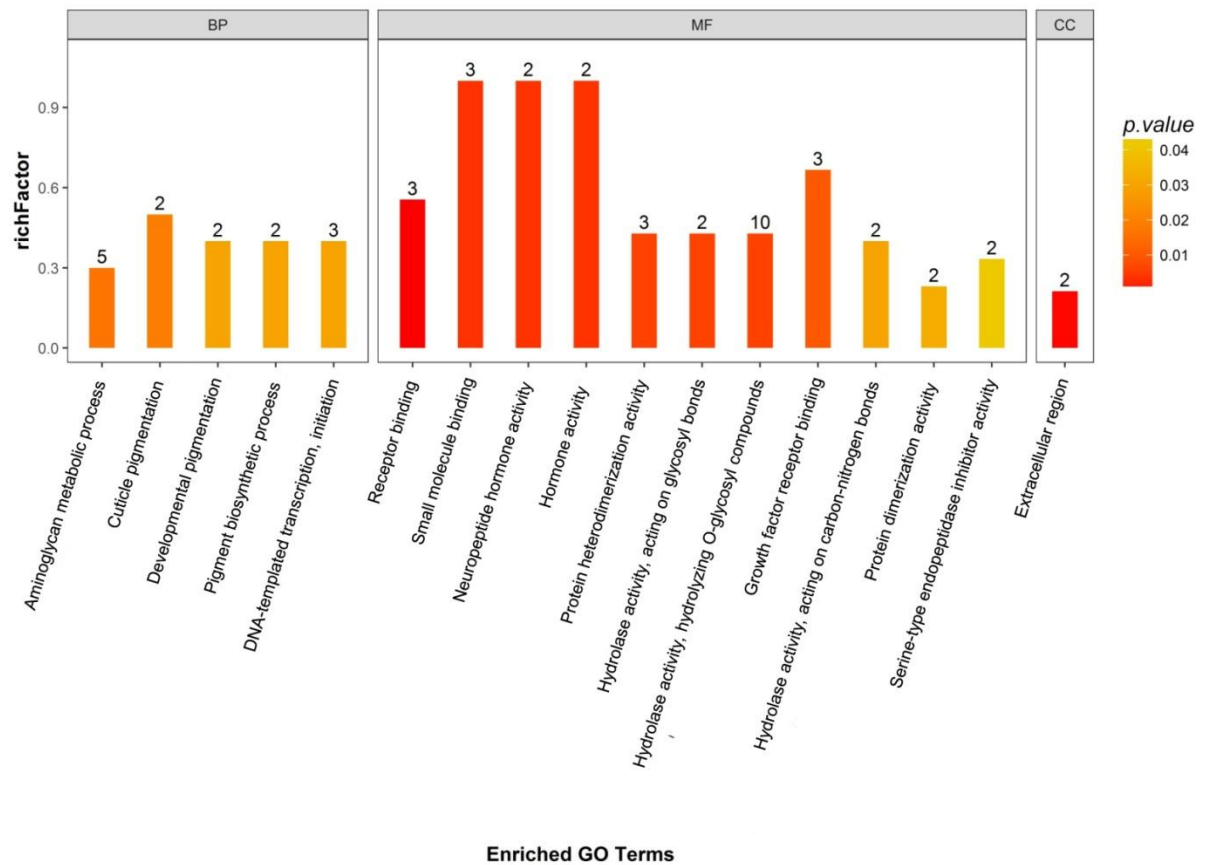

**Figure S2. GO enrichment analysis of differentially expressed proteins between the responsiveness and non-responsiveness male flies' antenna.** The *x*-axis represents the name of the GO terms, and *y*-axis represents the rich factor. The numbers on the columns represent the protein number. The color of column represents the corresponding *p*-value, and a corrected *p*-value < 0.05 were considered the most significant functional subcategories.

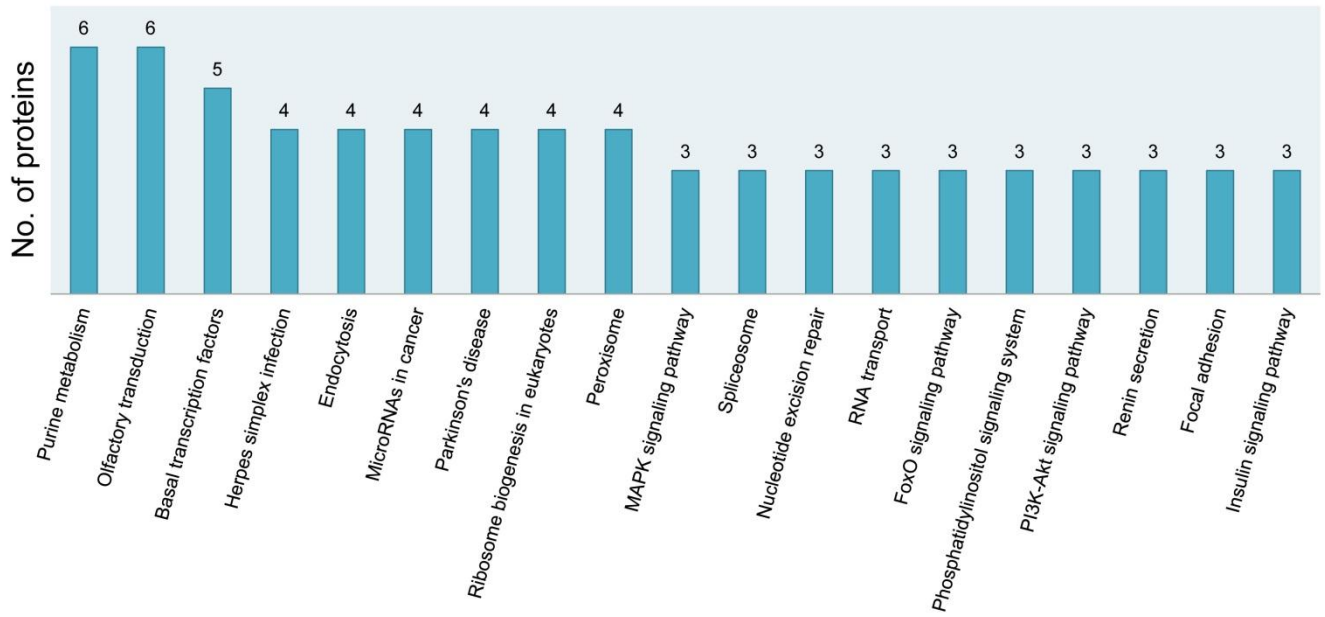

**Figure S3. The most represented KEGG pathways in *B.dorsalis* proteome.** The x-axis represents the name of the pathways, and the y-axis represents the protein number.

**Table S1.** Summary of the proteomics sequencing results.

| Group Name                       | Number |
|----------------------------------|--------|
| Total spectra                    | 266460 |
| Spectra                          | 48059  |
| Peptides                         | 26679  |
| Unique peptides                  | 25550  |
| Protein                          | 4622   |
| Differentially expressed protein | 277    |

**Table S2.** Primers used for gene expression detection by qPCR.

| Primer name                        | Nucleotide sequences (Forward) | Nucleotide sequences (Reverse) | Primer efficiency (%) |
|------------------------------------|--------------------------------|--------------------------------|-----------------------|
| <i>BdorOBP44a</i>                  | ACGCGCTGCTACATTGAGTG           | GTGCATGAGTCCGATTTCTG           | 97.83                 |
| <i>BdorOBA5</i>                    | GGCTAAAGGTTACGTGCTAG           | GCCACCAGCTCCATATCGT            | 95.45                 |
| <i>BdorOBP69a</i>                  | AGTGACCACTCTGGAGGTG            | TCCAAGTGCACGATGTTGTC           | 92.53                 |
| <i>BdorOBP2</i>                    | GTTTTGCTAGCCTTTGTCGC           | CTTGCATGCACTTGGAGAAG           | 95.11                 |
| <i>BdorOB19A</i>                   | TCGGATCAAGTTTCTGGCGG           | CCTTTCTTCATCGTTTGCATC          | 93.43                 |
| <i>BdorOB99A</i>                   | CAATGAAGTGCACAGCGTTC           | GTCCGGATAATCAAAGTTGTC          | 97.24                 |
| <i>BdorOBP83a-1</i>                | CACGTACAGGCACAGGAAC            | GTCACCGTTATCGTCCACC            | 95.99                 |
| <i>BdorOBP15</i>                   | CTAGTGGATAAGTACAAGGCC          | GCTTCCTTTGCGCAATTCTC           | 92.82                 |
| <i>BdorPBP4</i>                    | CAGTCTTGCTCTCTCACTGG           | AACGGTATTGTGTAAGTGGC           | 94.69                 |
| <i>BdorPBP2</i>                    | CTTGATTGTTTGTGTGGCGC           | CATCACCATTTCATCGCACCG          | 96.92                 |
| <i>BdorOR94b</i>                   | ACCGTTGTCGTGTTTCGCTTG          | GCTCAGACGCCAACCAATC            | 92.89                 |
| <i>BdorIR84a</i>                   | CGATCTGCGCATTGGTATTG           | GCCGGTAGAAAATGCTGCAG           | 94.88                 |
| <i><math>\alpha</math>-tubulin</i> | CGCATTTCATGGTTGATAACG          | GGGCACCAAGTTAGTCTGGA           | 94.73                 |

**Table S3.** Primers used for RNA interference analysis.

| Primer name     | Nucleotide sequences                                   |
|-----------------|--------------------------------------------------------|
| <i>dsOBP2-F</i> | <u>TAATACGACTCACTATAGGGAGACCACCTTCTCCAAGTGCATGCAAG</u> |
| <i>dsOBP2-R</i> | <u>TAATACGACTCACTATAGGGAGACCACAAATCCAAGCCCTCGTGCC</u>  |
| <i>dsGFP-F</i>  | <u>TAATACGACTCACTATAGGGGAGACCACACGGCCACAAGTTCAGCGT</u> |
| <i>dsGFP-R</i>  | <u>TAATACGACTCACTATAGGGGAGACCACGACCACTACCAGCAGAACA</u> |

Note: The underlined nucleotides sequence is T7 promoter.

**Table S4.** Identification of ORs in non-responsiveness and responsiveness *B.dorsalis* male antennae.

| <b>Accession Number</b> | <b>Protein Description</b> | <b>Theor.<br/>pI/MW (kDa)</b> | <b>Non-responsiveness/<br/>Responsiveness</b> | <b>Student's<br/><i>t</i>-test <i>P</i> value</b> |
|-------------------------|----------------------------|-------------------------------|-----------------------------------------------|---------------------------------------------------|
| A0A0G2UKH1              | Odorant receptor 13a       | 8.309/50.726                  | 1.059                                         | 0.0688                                            |
| A0A034WM57              | Odorant receptor 83b       | 8.499/53.078                  | 1.032                                         | 0.277                                             |
| A0A0G2UGJ8              | Odorant receptor 43a-1     | 6.138/43.552                  | 1.056                                         | 0.472                                             |
| A0A0G2UEX9              | Odorant receptor 67c       | 5.402/46.729                  | 0.954                                         | 0.599                                             |
| A0A0G2UEY4              | Odorant receptor 94b       | 8.558/46.003                  | 1.683                                         | 0.0198                                            |
